# Supplementary material
Source: MDPI journal article supplement (https://www.mdpi.com/1999-4907/12/4/489)
Supplement: s1 [file s1]

**Table S1. Location of samples analysed.** A total 132 individuals from 5 pine species were obtained (including 30 individuals of *Pinus mugo*, 32 of *P. uliginosa*, 30 *P. uncinata*, 30 of *P. sylvestris* and 10 of outgroup *P. pinaster*)

| Species              | Acr.  | Location                          | Longitude  | Latitude   | N                 |
|----------------------|-------|-----------------------------------|------------|------------|-------------------|
| <i>P. mugo</i>       | PM5   | Romania, Southern Carpathians     | 25°27'6"   | 45°25'55"  | 7 <sup>a</sup>    |
|                      | PM8   | Montenegro, Durmitor Mts.         | 19°05'27"  | 43°09'33"  | 7 <sup>a</sup>    |
|                      | PM12  | Austria, Karwendel Alps           | 11°17'45"  | 47°22'42"  | 6 <sup>a</sup>    |
|                      | PM14  | Italy, Carnic Alps                | 13°08'50"  | 46°32'40"  | 4 <sup>a</sup>    |
|                      | PM16  | Italy, Abruzzi                    | 13°58'30"  | 41°46'20"  | 6 <sup>a</sup>    |
| <i>P. uliginosa</i>  | PUG1  | Poland, Węgliniec reserve         | 15°14'20"  | 51°17'50"  | 10 <sup>a</sup>   |
|                      | PUG2  | Germany, Mittelwalde              | 11°16'27"  | 47°28'50"  | 9 <sup>a</sup>    |
|                      | PUG3  | Poland, Batorów reserve           | 16°23'1"   | 50°27'32"  | 13 <sup>a,c</sup> |
| <i>P. uncinata</i>   | PUN17 | Andora, Vall de Ransol            | 1°38'21"   | 42°35'02"  | 6 <sup>a</sup>    |
|                      | PUN18 | Andora, San Miguel de Engolasters | 1°34'12"   | 42°31'28"  | 6 <sup>a</sup>    |
|                      | PUN23 | Spain, Castiello de Jaca          | -0°32'12"  | 42°41'19"  | 6 <sup>a</sup>    |
|                      | PUN24 | Spain, Sierra de Gudar            | 0°41'51"   | 40°28'49"  | 6 <sup>a</sup>    |
|                      | PUN28 | France, Col de la Croix de Morano | -2°50'44"  | 45°35'58"  | 6 <sup>a</sup>    |
| <i>P. sylvestris</i> | PS30  | Scotland, Shildaig                | -5°38'24"  | 57° 30'35" | 6 <sup>b</sup>    |
|                      | PS31  | Scotland, Glen Tanar              | -2°51'36"  | 57° 2'60"  | 6 <sup>b</sup>    |
|                      | PS37  | Spain, Trevenque                  | -3°32'51"  | 37 05'47"  | 6 <sup>b</sup>    |
|                      | PS39  | Finland, Punkaharju               | 61°45'33"  | 29° 23'21" | 6 <sup>b</sup>    |
|                      | PS43  | Poland, Jarocin                   | 51°58'20"  | 17°28'40"  | 6 <sup>b</sup>    |
| <i>P. pinaster</i>   | PP1   | Spain, Oria                       | -2°17'42"  | 37°29'41"  | 1 <sup>c</sup>    |
|                      | PP2   | Spain, San Cipriano               | -7°26'21"  | 43°41'13"  | 1 <sup>c</sup>    |
|                      | PP3   | Spain, Coca                       | -4 31'48"  | 41°13'04"  | 1 <sup>c</sup>    |
|                      | PP4   | Spain, Olba                       | 0 37'22"   | 40 08'01"  | 1 <sup>c</sup>    |
|                      | PP5   | France, Mimizan                   | -1 14'56"  | 44 11'56"  | 1 <sup>c</sup>    |
|                      | PP6   | France, Bras Nord Var             | 5 56'01"   | 43 29'11"  | 1 <sup>c</sup>    |
|                      | PP7   | France, Pineta                    | 9 22'17.5" | 41 40'39"  | 1 <sup>c</sup>    |
|                      | PP8   | Portugal, Maria de Castelo Branco | 7 29'49"   | 39 49'31"  | 1 <sup>c</sup>    |
|                      | PP9   | Morocco, Ifran                    | 5 03'00"   | 33 35'53"  | 1 <sup>c</sup>    |
|                      | PP10  | Morocco, Zaouia d Ifrane          | -5 07'10"  | 33 33'58"  | 1 <sup>c</sup>    |

<sup>a</sup> data from Wachowiak *et al.* (2018), <sup>b</sup> data from Wachowiak *et al.* (unpublished), <sup>c</sup> sequenced in this study

**Table S2. Nuclear loci studied.**

| Locus<br>Acronym | PCR Primers (F-upper, and R-lower)                                           | Gene function [Category <sup>3</sup> ]               | Base pairs screened <sup>4</sup> . | Gene Bank Acc. Nr.  |
|------------------|------------------------------------------------------------------------------|------------------------------------------------------|------------------------------------|---------------------|
| Pr1_1            | <sup>1</sup> AGGAAGGAAGGGGAAAC<br><sup>2</sup> CAGGCTCCACTATATTG             | putative beta-alanine ligase [M]                     | 358                                | KC979156 - KC979177 |
| Pr1_11           | <sup>1</sup> GACCAGGCAAGGAAACAAAAG<br><sup>2</sup> TTGGCAATCGGTTGATGGGGAG    | putative glucuronidase 3 [M]                         | 720                                | KC979259 - KC979288 |
| Pr1_12           | <sup>1</sup> TCCCCATTCTCCAAAC<br><sup>2</sup> CCATCCAATCCTTCATC              | NAD(P)-linked oxidoreductase-like protein [M]        | 434                                | KC979289 - KC979325 |
| Pr1_14           | <sup>1</sup> CTGTATGGCGTTCTTC<br><sup>2</sup> ACTGGGCGTCAAGTTTC              | phospholipase A1-Igama [M]                           | 353                                | KC979348 - KC979373 |
| Pr1_15           | <sup>1</sup> CATTATTATCCAAGGGCGAG<br><sup>2</sup> GAGGCTTTGAGTCACCGTTAC      | mitogen-activated protein-kinase [ST]                | 592                                | KC979374 - KC979410 |
| Pr1_17           | <sup>1</sup> TGGGTTGTCTCTGTGG<br><sup>2</sup> TGAGTTGCTGTGAGAGG              | glutamate transporter [T]                            | 319                                | KC979424 - KC979435 |
| Pr1_18           | <sup>1</sup> AAGCGACTCAAAGGGG<br><sup>2</sup> TCGGCTGTATTGTCTC               | alpha 1,3-glucosidase [M]                            | 436                                | KC979436 - KC979460 |
| Pr1_19           | <sup>1</sup> CCGTATGCAAAGCATTTTC<br><sup>2</sup> ACCTGATCGTGTGTG             | Glycosyltransferase [M]                              | 327                                | KC979461-KC979482   |
| Pr1_21           | <sup>1</sup> GGGTGCATGTTTCATCCACAG<br><sup>2</sup> GCAGCAGCAAAAGCATTTGAAG    | histone H3 K4-specific-methyltransferase [M]         | 363                                | KC979483-KC979505   |
| Pr1_22           | <sup>1</sup> TGAAGGGAGAGGACTAC<br><sup>2</sup> ACCCAGAAACACAAAGAGGAAAC       | hypothetical protein [UN]                            | 277                                | KC979506-KC979528   |
| Pr1_24           | <sup>1</sup> ATGGATATTCTCCATGATGCAC<br><sup>2</sup> ATGGTCGTCTTTTGCTTC       | putative S-adenosylmethionine-dependent protein [ST] | 262                                | KC979529-KC979537   |
| Pr1_26           | <sup>1</sup> CCCATTTTAGCAAACCC<br><sup>2</sup> GAAGTGAAGATGAGCATAAG          | putative pre-mRNA branch site-protein p14 [E]        | 386                                | KC979538 - KC979603 |
| Pr1_29           | <sup>1</sup> CCATTGGTGTGTCTTCTC<br><sup>2</sup> AATACCCCTTTCAAGGCAAGCATATC   | short-chain dehydrogenase Protein [M]                | 242                                | KC979622 - KC979653 |
| Pr1_36           | <sup>1</sup> GCGTTCATCATCTCAAGCC<br><sup>2</sup> CTAATCTCTCTTATTGTCATCTCCACC | transcribed locus [UN]                               | 387                                | KC979674 - KC979696 |
| Pr1_43           | <sup>1</sup> GGACATTGTACTGTTGG<br><sup>2</sup> GGGTAAATGGAAAGAGTATTGG        | beta-galactosidase [M]                               | 591                                | KC979722 - KC979747 |
| Pr1_45           | <sup>1</sup> GAAATAGTCCTCTTCCTTTG<br><sup>2</sup> GGCTGCTTTGGATTATATTG       | O-fucosyltransferase-like protein [M]                | 310                                | KC979748 - KC979765 |
| Pr1_47           | <sup>1</sup> GTAAATCTTCTTGCCCTTTCATCC<br><sup>2</sup> TATGCTCAACATACAGTACC   | glycoprotein glucosyltransferase[M]                  | 542                                | KC979786 - KC979800 |
| Pr1_48           | <sup>1</sup> ACCAATGCACATGCCAC<br><sup>2</sup> TATTACATCACTCCACCTTC          | transport protein [T]                                | 383                                | KC979801- KC979827  |
| Pr2_7            | <sup>1</sup> CAAAACCCCTTTGAGCAC<br><sup>2</sup> GAGAACTTCTTCCATTCC           | transcribed locus [UN]                               | 410                                | KC979875 - KC979887 |
| Pr2_11           | <sup>1</sup> ACAGCAGCGATTCAAC<br><sup>2</sup> AACACCTCTTCCTCGTC              | 3-ketoacyl-CoA synthase 6-like[M]                    | 216                                | KC979904 - KC979919 |
| Pr2_16           | <sup>1</sup> TCACTTGGCAGAAGAC<br><sup>2</sup> GAGAGATTCTTTGGAGAC             | glutamyl-tRNA reductase [M]                          | 384                                | KC979936 - KC979946 |

|        |                                                                                   |                                                            |     |                     |
|--------|-----------------------------------------------------------------------------------|------------------------------------------------------------|-----|---------------------|
| Pr2_17 | <sup>1</sup> GCATTAGTCTGTCTGTTC<br><sup>2</sup> GTGTTTCTAGGGCAATC                 | putative polyol transporter [T]                            | 390 | KC979947 - KC979961 |
| Pr2_20 | <sup>1</sup> TCGAAGACAAGCTCTG<br><sup>2</sup> GACGACGATAAATGCTAC                  | GDP-dissociation inhibitor family-Protein [T]              | 380 | KC979962 - KC979984 |
| Pr2_23 | <sup>1</sup> GCCCAAATGGTTATACATAACACTC<br><sup>2</sup> CCATTCCATCGGCACAGTCATC     | Transcribed locus [UN]                                     | 337 | KC979985 - KC980011 |
| Pr2_25 | <sup>1</sup> TCCCTGAAATCAAATCCCAC<br><sup>2</sup> AACCCAGCAATCTGAGCAAAGAAAAAC     | hypothetical protein [UN]                                  | 403 | KC980012 - KC980024 |
| Pr2_28 | <sup>1</sup> CCTCCCATCATTTCTTTCTTCC<br><sup>2</sup> GAATTGCAGCCCTTGACACAAGAC      | basic leucine zipper transcription-factor-like protein [E] | 484 | KC980025 - KC980041 |
| Pr2_29 | <sup>1</sup> GGCTTTGAACACCCTCAAAAATAC<br><sup>2</sup> TAAGGACATCAATACCAGTTTGCTCAG | hypothetical protein [UN]                                  | 333 | KC980042 - KC980058 |
| Pr2_30 | <sup>1</sup> CACTTGTCATCTGCTC<br><sup>2</sup> CTTGGAAGGATAGAATCTG                 | U-box domain-containing [ST]<br>protein                    | 362 | KC980059 - KC980073 |
| Pr2_32 | <sup>1</sup> GAATAGAAATAGAGTGCGATGG<br><sup>2</sup> AAAAATGATGGCTGCGTGAGG         | hypothetical protein [UN]                                  | 366 | KC980074 - KC980091 |
| Pr2_34 | <sup>1</sup> CATTTCCAAGAGAAGACGAC<br><sup>2</sup> TGCCAACTCCACTCCCTAC             | ATP/ADP transporter [T]                                    | 362 | KC980092 - KC980103 |
| Pr2_35 | <sup>1</sup> ACCCACAAATTGCCAG<br><sup>2</sup> GCCGTGATTATCGAAGAG                  | DEAD-box ATP-dependent RNA- helicase [M]                   | 420 | KC980104 - KC980122 |
| Pr2_38 | <sup>1</sup> CCATCATACAACTATCCAC<br><sup>2</sup> ACAGAGAATAATGGGGCAC              | hypothetical protein [UN]                                  | 451 | KC980123 - KC980143 |
| Pr2_41 | <sup>1</sup> GAAAAGGATCAAATTGTGGG<br><sup>2</sup> GCTAACATTGGCTGTGG               | F-box protein GID2 [ST]                                    | 372 | KC980144 - KC980160 |
| Pr2_45 | <sup>1</sup> AACCGTCCTGATGAGCCTTG<br><sup>2</sup> CAGCCTTTCTTACAGACAC             | hypothetical protein [UN]                                  | 399 | KC980189 - KC980218 |
| Pr2_47 | <sup>1</sup> TTCATAAAGCCCCCATCC<br><sup>2</sup> TCTGATTTCAAAGTCGCC                | hexokinase 1 [ST]                                          | 552 | KC980219 - KC980234 |
| Pr2_48 | <sup>1</sup> GCTATGCGTTACTTGG<br><sup>2</sup> TGAGTTGAGCTGCTTG                    | S-methyl-5-thioribose kinase [ST]                          | 713 | KC980235 - KC980278 |
| ccoamt | GCAGCAGAAAGTGAAGGCTCAGA<br>TCTTTCCATCATCGGGCAATG                                  | Caffeoyl CoA O-methyltransferase <sup>d</sup> [M]          | 381 | KC980357 - KC980372 |
| rps10  | CACCCAGAAATTGATGTTCCAAATC<br>CCAGCCTTRTCACCAAATTCTCCAG                            | ribosomal protein S10 <sup>a</sup> [M]                     | 355 | KC980507 - KC980518 |
| hp927  | <sup>1</sup> GCAATGAGGGATTGAATTAC<br><sup>2</sup> TTGGAAGAATACAAGGCAGG            | hypothetical protein [UN]                                  | 360 | KC980519 - KC980542 |
| Pr4-5  | <sup>1</sup> CATCTCCTTCAAACCTCTATTTC<br><sup>2</sup> GATGCTTGAACATGATCCC          | calcium dependent proteokinase <sup>e</sup> [ST]           | 357 | KC980680 - KC980695 |
| Pr4-10 | <sup>1</sup> CATTGCCCTACGATTTC<br><sup>2</sup> CTTTTGAGATGAACCAGAC                | mys transcription factor <sup>e</sup> [E]                  | 358 | KC980696 - KC980702 |
| Pr4-11 | <sup>1</sup> CCTTCTATTGAATCCCTTG<br><sup>2</sup> CATAGTAACAGCCTACAG               | scl1 protein <sup>e</sup> [E]                              | 410 | KC980703 - KC980724 |
| Pr4-12 | <sup>1</sup> CTGCTCAAGTGAAAGG<br><sup>2</sup> CTGATTGTGGATTCTGTG                  | proton myo-inositol transporter <sup>e</sup> [T]           | 530 | KC980725 - KC980745 |
| Pr4-18 | <sup>1</sup> AGAGAGGGAATTGGTTGAG                                                  | myblike DNA-binding protein <sup>e</sup> [E]               | 321 | KC980763 - KC980769 |

|        |                                                                                                               |                                                                             |     |                     |
|--------|---------------------------------------------------------------------------------------------------------------|-----------------------------------------------------------------------------|-----|---------------------|
| Pr4-21 | <sup>2</sup> AAGGAAAGAAAAAGTCTGCTGATGG<br><sup>1</sup> ACATGGTGTGTTGGCAGG<br><sup>2</sup> AATGAGGAGGGTGGTAGAG | Receptor protein kinase <sup>e</sup> [ST]                                   | 357 | KC980786 - KC980810 |
| Pr4-27 | <sup>1</sup> TAGCAGACGGTATTCACACAGTCC<br><sup>2</sup> CCACAACCACCTTGCATCATTATTT                               | putative auxin induced -<br>transcription factor <sup>e</sup> [E]           | 403 | KC980811 - KC980829 |
| Pr4-34 | <sup>1</sup> ACCCTGTATCGATGGGTATGGAGAT<br><sup>2</sup> TTTCATGTGGTTTGTGGTACAGAACCTGCAATCA                     | transcription factor bHLH62-<br>like- gene <sup>e</sup> [E]                 | 360 | KC980830 - KC980841 |
| Pr4-38 | <sup>1</sup> TTATTTACATCCAACAGCGCCATTT<br><sup>2</sup> GAAAGTATGGATTGCCAACTTGCAC                              | SET-B-like gene <sup>e</sup> [M]                                            | 512 | KC980842 - KC980863 |
| Pr4-41 | <sup>1</sup> TGCAAGCTGTAAGGTAAAACCTCAT<br><sup>2</sup> CAACATCAAACTGAAACCACCAGTC                              | ethylene responsive element-<br>binding protein-like gene <sup>e</sup> [ST] | 591 | KC980864 - KC980906 |

<sup>1,2</sup> - vector sequence (1=GTAAACGACGGCCAGT and 2=CAGGAAACAGCTATGACC) was present as a part of PCR primers used for amplification of the loci studied; <sup>3</sup> - E-gene expression regulation; M-metabolisms; ST-signal transduction; T-transport; UN-unknown; <sup>4</sup>-average across all samples. DNA regions described in: <sup>a</sup>Palm *et al.* 2008; <sup>b</sup>Pyhäjärvi *et al.*, 2007; <sup>c</sup>Wachowiak *et al.* 2009; <sup>d</sup>Eveno *et al.*, 2007; <sup>e</sup>Ersoz *et al.* 2010, <sup>f</sup>Donnelly *et al.* 2016.

Table S3. Summary statistic at each locus in four pine species.

| Locus   | Species              | N  | L<br>(bp) | P  | S  | Nucleotide polymorphisms |                 |   |         |                | SD    |
|---------|----------------------|----|-----------|----|----|--------------------------|-----------------|---|---------|----------------|-------|
|         |                      |    |           |    |    | p <sub>total</sub>       | D               | R | Ks      | H <sub>a</sub> |       |
| ccoamt  | <i>P. uliginosa</i>  | 31 | 381       | 11 | 6  | 0.00401                  | -1.423          | 1 | 1.392   | 0.643          | 0.088 |
|         | <i>P. mugo</i>       | 29 | 381       | 6  | 3  | 0.00244                  | -1.124          | 0 | 0.844   | 0.547          | 0.096 |
|         | <i>P. uncinata</i>   | 29 | 381       | 6  | 4  | 0.00202                  | -1.43           | 0 | 0.696   | 0.424          | 0.111 |
|         | <i>P. sylvestris</i> | 29 | 381       | 6  | 2  | 0.00295                  | -0.762          | 0 | 1.018   | 0.254          | 0.100 |
| hp927   | <i>P. uliginosa</i>  | 31 | 360       | 7  | 2  | 0.00562                  | 0.45            | 2 | 0.702   | 0.847          | 0.042 |
|         | <i>P. mugo</i>       | 30 | 360       | 5  | 2  | 0.00335                  | -0.124          | 0 | 0.951   | 0.683          | 0.049 |
|         | <i>P. uncinata</i>   | 30 | 360       | 7  | 3  | 0.00531                  | 0.236           | 0 | 0.515   | 0.625          | 0.076 |
|         | <i>P. sylvestris</i> | 28 | 360       | 11 | 2  | 0.00815                  | 0.123           | 0 | 0.684   | 0.841          | 0.039 |
| PR_1_1  | <i>P. uliginosa</i>  | 26 | 358       | 4  | 1  | 0.00264                  | -0.264          | 0 | 0.79226 | 0.698          | 0.062 |
|         | <i>P. mugo</i>       | 30 | 358       | 5  | 3  | 0.00292                  | -0.467          | 0 | 0.89655 | 0.653          | 0.069 |
|         | <i>P. uncinata</i>   | 30 | 358       | 7  | 4  | 0.00396                  | -0.582          | 0 | 1.21576 | 0.706          | 0.064 |
|         | <i>P. sylvestris</i> | 28 | 358       | 6  | 1  | 0.00263                  | -1.129          | 0 | 0.7991  | 0.619          | 0.098 |
| PR_1_11 | <i>P. uliginosa</i>  | 21 | 720       | 22 | 5  | 0.00959                  | 0.44801         | 1 | 5.71167 | 0.848          | 0.054 |
|         | <i>P. mugo</i>       | 30 | 720       | 18 | 4  | 0.00298                  | <b>-1.83234</b> | 0 | 2.34726 | 0.51           | 0.109 |
|         | <i>P. uncinata</i>   | 30 | 720       | 20 | 2  | 0.00932                  | 1.10422         | 2 | 5.8256  | 0.8            | 0.056 |
|         | <i>P. sylvestris</i> | 27 | 720       | 18 | 0  | 0.00964                  | 1.6588          | 3 | 6.85705 | 0.821          | 0.038 |
| PR_1_12 | <i>P. uliginosa</i>  | 32 | 434       | 15 | 7  | 0.00823                  | -0.36001        | 1 | 2.85327 | 0.893          | 0.037 |
|         | <i>P. mugo</i>       | 30 | 434       | 16 | 7  | 0.00805                  | -0.6537         | 0 | 2.78294 | 0.92           | 0.024 |
|         | <i>P. uncinata</i>   | 30 | 434       | 7  | 2  | 0.00601                  | 0.85965         | 0 | 2.08267 | 0.763          | 0.039 |
|         | <i>P. sylvestris</i> | 29 | 434       | 12 | 8  | 0.00293                  | <b>-1.93035</b> | 0 | 1.29887 | 0.377          | 0.115 |
| PR_1_14 | <i>P. uliginosa</i>  | 28 | 353       | 9  | 2  | 0.00461                  | -0.34752        | 0 | 2.04938 | 0.69           | 0.068 |
|         | <i>P. mugo</i>       | 29 | 353       | 8  | 3  | 0.00661                  | 0.44777         | 0 | 2.28571 | 0.722          | 0.07  |
|         | <i>P. uncinata</i>   | 27 | 353       | 10 | 3  | 0.00712                  | -0.10203        | 0 | 2.43269 | 0.627          | 0.094 |
|         | <i>P. sylvestris</i> | 29 | 353       | 7  | 2  | 0.00581                  | 0.4459          | 1 | 2.04202 | 0.786          | 0.05  |
| PR_1_15 | <i>P. uliginosa</i>  | 24 | 592       | 18 | 6  | 0.00538                  | -1.2321         | 0 | 2.92977 | 0.442          | 0.124 |
|         | <i>P. mugo</i>       | 28 | 592       | 26 | 17 | 0.00699                  | -1.4823         | 0 | 3.93333 | 0.635          | 0.104 |
|         | <i>P. uncinata</i>   | 30 | 592       | 16 | 13 | 0.00212                  | <b>-2.34263</b> | 0 | 1.17457 | 0.469          | 0.114 |
|         | <i>P. sylvestris</i> | 27 | 592       | 13 | 1  | 0.00565                  | 0.03948         | 0 | 3.10345 | 0.55           | 0.108 |
| PR_1_17 | <i>P. uliginosa</i>  | 32 | 319       | 13 | 2  | 0.01066                  | -0.29051        | 3 | 2.72214 | 0.861          | 0.050 |
|         | <i>P. mugo</i>       | 30 | 319       | 6  | 0  | 0.00581                  | 0.63752         | 0 | 1.52854 | 0.825          | 0.041 |
|         | <i>P. uncinata</i>   | 29 | 319       | 6  | 3  | 0.00527                  | 0.28628         | 0 | 1.39153 | 0.751          | 0.049 |
|         | <i>P. sylvestris</i> | 29 | 319       | 2  | 0  | 0.0012                   | -0.50812        | 0 | 0.42816 | 0.192          | 0.09  |
| PR_1_18 | <i>P. uliginosa</i>  | 32 | 436       | 8  | 2  | 0.00489                  | 0.18747         | 1 | 2.10138 | 0.835          | 0.045 |
|         | <i>P. mugo</i>       | 30 | 436       | 8  | 5  | 0.00368                  | -0.64815        | 0 | 1.62591 | 0.761          | 0.043 |
|         | <i>P. uncinata</i>   | 30 | 436       | 10 | 1  | 0.00536                  | -0.26255        | 0 | 2.28631 | 0.885          | 0.022 |
|         | <i>P. sylvestris</i> | 29 | 436       | 9  | 2  | 0.00498                  | -0.18324        | 0 | 2.14286 | 0.732          | 0.072 |
| PR_1_19 | <i>P. uliginosa</i>  | 28 | 327       | 9  | 1  | 0.01018                  | 1.38607         | 0 | 2.84662 | 0.786          | 0.046 |
|         | <i>P. mugo</i>       | 30 | 327       | 11 | 3  | 0.00993                  | 0.54669         | 0 | 2.84995 | 0.809          | 0.043 |
|         | <i>P. uncinata</i>   | 30 | 327       | 8  | 1  | 0.00837                  | 1.07752         | 0 | 2.37969 | 0.54           | 0.099 |
|         | <i>P. sylvestris</i> | 29 | 327       | 7  | 1  | 0.00908                  | 1.9854          | 1 | 2.56408 | 0.739          | 0.045 |
| PR_1_21 | <i>P. uliginosa</i>  | 31 | 363       | 10 | 4  | 0.00554                  | -1.14317        | 2 | 1.91978 | 0.871          | 0.039 |
|         | <i>P. mugo</i>       | 29 | 363       | 10 | 7  | 0.00405                  | -1.3638         | 0 | 1.55718 | 0.714          | 0.068 |
|         | <i>P. uncinata</i>   | 30 | 363       | 5  | 2  | 0.00358                  | -0.01497        | 0 | 1.40249 | 0.63           | 0.058 |
|         | <i>P. sylvestris</i> | 27 | 363       | 7  | 4  | 0.00426                  | -0.47302        | 0 | 1.617   | 0.632          | 0.096 |
| PR_1_22 | <i>P. uliginosa</i>  | 22 | 277       | 14 | 8  | 0.01034                  | -0.91956        | 1 | 2.34603 | 0.732          | 0.072 |
|         | <i>P. mugo</i>       | 29 | 277       | 4  | 0  | 0.00628                  | 1.8327          | 1 | 1.47104 | 0.697          | 0.04  |
|         | <i>P. uncinata</i>   | 30 | 277       | 8  | 1  | 0.00794                  | 0.27175         | 0 | 1.84211 | 0.766          | 0.049 |
|         | <i>P. sylvestris</i> | 28 | 277       | 10 | 1  | 0.01501                  | 1.96915         | 0 | 3.33333 | 0.5            | 0.07  |
| PR_1_24 | <i>P. uliginosa</i>  | 26 | 262       | 5  | 2  | 0.00497                  | -0.01892        | 0 | 1.02546 | 0.535          | 0.096 |
|         | <i>P. mugo</i>       | 28 | 262       | 6  | 2  | 0.00421                  | -0.82607        | 0 | 0.88254 | 0.524          | 0.103 |
|         | <i>P. uncinata</i>   | 30 | 262       | 5  | 0  | 0.00372                  | -0.62122        | 0 | 0.79031 | 0.451          | 0.103 |
|         | <i>P. sylvestris</i> | 28 | 262       | 4  | 1  | 0.00473                  | 0.53505         | 0 | 0.99048 | 0.442          | 0.087 |
| PR_1_26 | <i>P. uliginosa</i>  | 25 | 386       | 18 | 5  | 0.01411                  | 0.2655          | 4 | 4.32552 | 0.827          | 0.067 |
|         | <i>P. mugo</i>       | 28 | 386       | 28 | 15 | 0.01743                  | -0.24467        | 5 | 5.36931 | 0.923          | 0.035 |
|         | <i>P. uncinata</i>   | 23 | 386       | 23 | 8  | 0.01639                  | 0.02691         | 3 | 4.81212 | 0.905          | 0.041 |
|         | <i>P. sylvestris</i> | 29 | 386       | 29 | 8  | 0.0175                   | -0.34362        | 5 | 5.38492 | 0.889          | 0.033 |

|                |                      |    |     |    |    |         |                 |   |         |       |       |
|----------------|----------------------|----|-----|----|----|---------|-----------------|---|---------|-------|-------|
| <b>PR_1_29</b> | <i>P. uliginosa</i>  | 30 | 242 | 6  | 2  | 0.00686 | 0.27368         | 1 | 1.6907  | 0.611 | 0.088 |
|                | <i>P. mugo</i>       | 29 | 242 | 7  | 2  | 0.00491 | -0.99482        | 0 | 1.26339 | 0.473 | 0.11  |
|                | <i>P. uncinata</i>   | 30 | 242 | 5  | 1  | 0.00575 | 0.27821         | 0 | 1.44619 | 0.343 | 0.097 |
|                | <i>P. sylvestris</i> | 28 | 242 | 7  | 2  | 0.00903 | 0.64537         | 0 | 2.16726 | 0.638 | 0.061 |
| <b>PR_1_36</b> | <i>P. uliginosa</i>  | 30 | 387 | 13 | 8  | 0.00493 | -1.47236        | 1 | 2.12302 | 0.825 | 0.052 |
|                | <i>P. mugo</i>       | 29 | 387 | 7  | 2  | 0.00421 | -0.3856         | 0 | 1.91667 | 0.759 | 0.047 |
|                | <i>P. uncinata</i>   | 30 | 387 | 12 | 7  | 0.00537 | -1.30811        | 0 | 2.25536 | 0.839 | 0.038 |
|                | <i>P. sylvestris</i> | 28 | 387 | 10 | 3  | 0.00525 | -0.77939        | 0 | 2.24339 | 0.804 | 0.041 |
| <b>PR_1_43</b> | <i>P. uliginosa</i>  | 28 | 591 | 11 | 2  | 0.00402 | -0.52141        | 2 | 2.64915 | 0.87  | 0.036 |
|                | <i>P. mugo</i>       | 30 | 591 | 12 | 8  | 0.00328 | -1.17787        | 0 | 2.29664 | 0.814 | 0.044 |
|                | <i>P. uncinata</i>   | 30 | 591 | 10 | 2  | 0.00421 | -0.04623        | 0 | 2.72104 | 0.844 | 0.037 |
|                | <i>P. sylvestris</i> | 29 | 591 | 10 | 5  | 0.00381 | -0.36986        | 0 | 2.54699 | 0.685 | 0.065 |
| <b>PR_1_45</b> | <i>P. uliginosa</i>  | 30 | 310 | 10 | 2  | 0.00995 | 0.02815         | 2 | 2.60153 | 0.818 | 0.060 |
|                | <i>P. mugo</i>       | 27 | 310 | 10 | 2  | 0.00726 | -0.72263        | 0 | 1.93473 | 0.781 | 0.071 |
|                | <i>P. uncinata</i>   | 30 | 310 | 10 | 3  | 0.01038 | 0.47475         | 0 | 2.71073 | 0.809 | 0.043 |
|                | <i>P. sylvestris</i> | 29 | 310 | 9  | 2  | 0.01049 | 0.84323         | 0 | 2.72449 | 0.786 | 0.04  |
| <b>PR_1_47</b> | <i>P. uliginosa</i>  | 22 | 542 | 3  | 0  | 0.00165 | 0.14824         | 0 | 0.82653 | 0.506 | 0.106 |
|                | <i>P. mugo</i>       | 30 | 542 | 0  | 0  | 0       | 0               | 0 | 0.11111 | 0     | 0     |
|                | <i>P. uncinata</i>   | 30 | 542 | 4  | 1  | 0.00143 | -0.60921        | 0 | 0.75287 | 0.522 | 0.091 |
|                | <i>P. sylvestris</i> | 29 | 542 | 7  | 2  | 0.00375 | 0.41296         | 0 | 1.79592 | 0.709 | 0.059 |
| <b>PR_1_48</b> | <i>P. uliginosa</i>  | 32 | 383 | 9  | 3  | 0.00628 | -0.1055         | 1 | 2.4265  | 0.875 | 0.042 |
|                | <i>P. mugo</i>       | 28 | 383 | 8  | 3  | 0.00479 | -0.33014        | 0 | 1.99148 | 0.772 | 0.057 |
|                | <i>P. uncinata</i>   | 30 | 383 | 6  | 2  | 0.00397 | 0.00946         | 0 | 1.73347 | 0.621 | 0.091 |
|                | <i>P. sylvestris</i> | 29 | 383 | 20 | 13 | 0.00602 | <b>-1.92302</b> | 0 | 2.35135 | 0.569 | 0.106 |
| <b>PR_2_7</b>  | <i>P. uliginosa</i>  | 31 | 410 | 31 | 26 | 0.00677 | <b>-2.52116</b> | 0 | 3.23333 | 0.624 | 0.099 |
|                | <i>P. mugo</i>       | 30 | 410 | 1  | 0  | 0.00045 | -0.40885        | 0 | 0.15747 | 0.186 | 0.088 |
|                | <i>P. uncinata</i>   | 30 | 410 | 1  | 0  | 0.00031 | -0.76373        | 0 | 0.88177 | 0.129 | 0.079 |
|                | <i>P. sylvestris</i> | 25 | 410 | 4  | 1  | 0.00262 | 0.03571         | 0 | 1.79444 | 0.457 | 0.105 |
| <b>PR_2_11</b> | <i>P. uliginosa</i>  | 31 | 213 | 3  | 2  | 0.00143 | -1.37016        | 0 | 0.32222 | 0.243 | 0.099 |
|                | <i>P. mugo</i>       | 28 | 213 | 3  | 2  | 0.00184 | -1.16485        | 0 | 0.39731 | 0.323 | 0.108 |
|                | <i>P. uncinata</i>   | 30 | 213 | 2  | 1  | 0.00117 | -1.02235        | 0 | 0.27389 | 0.246 | 0.098 |
|                | <i>P. sylvestris</i> | 28 | 213 | 2  | 1  | 0.00229 | -0.07831        | 0 | 0.48036 | 0.474 | 0.079 |
| <b>PR_2_16</b> | <i>P. uliginosa</i>  | 31 | 384 | 9  | 0  | 0.00627 | 0.21331         | 1 | 1.96491 | 0.733 | 0.058 |
|                | <i>P. mugo</i>       | 30 | 384 | 11 | 3  | 0.00834 | 0.4934          | 0 | 2.59646 | 0.669 | 0.076 |
|                | <i>P. uncinata</i>   | 30 | 384 | 10 | 2  | 0.00526 | -0.63174        | 0 | 1.6384  | 0.639 | 0.069 |
|                | <i>P. sylvestris</i> | 27 | 384 | 2  | 0  | 0.00248 | 1.76461         | 0 | 0.75566 | 0.655 | 0.049 |
| <b>PR_2_17</b> | <i>P. uliginosa</i>  | 32 | 390 | 3  | 1  | 0.00274 | 1.00411         | 0 | 0.92804 | 0.569 | 0.048 |
|                | <i>P. mugo</i>       | 30 | 390 | 4  | 1  | 0.00314 | 0.54829         | 0 | 1.04753 | 0.605 | 0.052 |
|                | <i>P. uncinata</i>   | 30 | 390 | 5  | 1  | 0.00344 | 0.17386         | 0 | 1.14259 | 0.667 | 0.063 |
|                | <i>P. sylvestris</i> | 27 | 390 | 5  | 2  | 0.0018  | -1.28947        | 0 | 0.61538 | 0.447 | 0.113 |
| <b>PR_2_20</b> | <i>P. uliginosa</i>  | 30 | 380 | 4  | 2  | 0.00199 | -0.65598        | 0 | 0.98719 | 0.395 | 0.100 |
|                | <i>P. mugo</i>       | 29 | 380 | 7  | 4  | 0.00363 | -0.68198        | 1 | 1.52521 | 0.773 | 0.057 |
|                | <i>P. uncinata</i>   | 30 | 380 | 14 | 2  | 0.00621 | -1.11634        | 0 | 2.35862 | 0.701 | 0.062 |
|                | <i>P. sylvestris</i> | 29 | 380 | 7  | 3  | 0.00374 | -0.60788        | 1 | 1.56303 | 0.635 | 0.077 |
| <b>PR_2_23</b> | <i>P. uliginosa</i>  | 30 | 337 | 9  | 5  | 0.00504 | -0.78372        | 0 | 1.71571 | 0.779 | 0.063 |
|                | <i>P. mugo</i>       | 28 | 337 | 6  | 1  | 0.00404 | -0.33785        | 0 | 1.43965 | 0.733 | 0.066 |
|                | <i>P. uncinata</i>   | 30 | 337 | 8  | 0  | 0.00489 | -0.56861        | 0 | 1.66782 | 0.733 | 0.079 |
|                | <i>P. sylvestris</i> | 27 | 337 | 10 | 7  | 0.00454 | -1.33449        | 1 | 1.57669 | 0.755 | 0.059 |
| <b>PR_2_25</b> | <i>P. uliginosa</i>  | 31 | 403 | 7  | 2  | 0.00432 | -0.02436        | 0 | 1.46911 | 0.804 | 0.044 |
|                | <i>P. mugo</i>       | 30 | 403 | 4  | 1  | 0.00276 | 0.25599         | 0 | 0.96681 | 0.563 | 0.072 |
|                | <i>P. uncinata</i>   | 30 | 403 | 5  | 2  | 0.00348 | 0.30306         | 1 | 1.1973  | 0.687 | 0.055 |
|                | <i>P. sylvestris</i> | 27 | 403 | 5  | 2  | 0.00341 | 0.16435         | 1 | 1.1573  | 0.675 | 0.056 |
| <b>PR_2_28</b> | <i>P. uliginosa</i>  | 31 | 403 | 7  | 2  | 0.00432 | -0.02436        | 0 | 1.46911 | 0.804 | 0.044 |
|                | <i>P. mugo</i>       | 30 | 403 | 4  | 1  | 0.00276 | 0.25599         | 0 | 0.96681 | 0.563 | 0.072 |
|                | <i>P. uncinata</i>   | 30 | 403 | 5  | 2  | 0.00348 | 0.30306         | 1 | 1.1973  | 0.687 | 0.055 |
|                | <i>P. sylvestris</i> | 27 | 403 | 5  | 2  | 0.00341 | 0.16435         | 1 | 1.1573  | 0.675 | 0.056 |
| <b>PR_2_29</b> | <i>P. uliginosa</i>  | 30 | 333 | 7  | 3  | 0.00428 | -0.5713         | 0 | 1.18774 | 0.57  | 0.092 |
|                | <i>P. mugo</i>       | 30 | 333 | 6  | 2  | 0.00242 | -1.33328        | 0 | 0.67241 | 0.492 | 0.1   |
|                | <i>P. uncinata</i>   | 29 | 333 | 4  | 1  | 0.00402 | 0.81756         | 0 | 1.1102  | 0.463 | 0.080 |
|                | <i>P. sylvestris</i> | 24 | 333 | 5  | 0  | 0.00408 | 0.02707         | 0 | 1.08116 | 0.576 | 0.097 |
| <b>PR_2_30</b> | <i>P. uliginosa</i>  | 31 | 362 | 5  | 0  | 0.00493 | 1.15297         | 0 | 1.60928 | 0.753 | 0.032 |
|                | <i>P. mugo</i>       | 27 | 362 | 5  | 0  | 0.00351 | -0.05742        | 0 | 1.19247 | 0.604 | 0.085 |

|                |                      |    |     |    |    |         |                 |   |         |       |       |
|----------------|----------------------|----|-----|----|----|---------|-----------------|---|---------|-------|-------|
|                | <i>P. uncinata</i>   | 29 | 362 | 5  | 2  | 0.0031  | -0.32432        | 0 | 1.08108 | 0.692 | 0.063 |
|                | <i>P. sylvestris</i> | 27 | 362 | 4  | 1  | 0.00233 | -0.49529        | 0 | 0.86279 | 0.55  | 0.085 |
| <b>PR_2_32</b> | <i>P. uliginosa</i>  | 32 | 366 | 10 | 3  | 0.00608 | -0.32609        | 1 | 1.9377  | 0.869 | 0.036 |
|                | <i>P. mugo</i>       | 29 | 366 | 5  | 2  | 0.00373 | 0.19747         | 0 | 1.27676 | 0.539 | 0.093 |
|                | <i>P. uncinata</i>   | 30 | 366 | 8  | 3  | 0.00541 | -0.05679        | 0 | 1.74176 | 0.766 | 0.061 |
|                | <i>P. sylvestris</i> | 25 | 366 | 6  | 1  | 0.00677 | 1.03887         | 0 | 2.06111 | 0.803 | 0.04  |
| <b>PR_2_34</b> | <i>P. uliginosa</i>  | 29 | 362 | 3  | 2  | 0.00036 | -1.44456        | 0 | 0.53151 | 0.129 | 0.079 |
|                | <i>P. mugo</i>       | 30 | 362 | 1  | 0  | 0.00036 | -0.76373        | 0 | 0.2532  | 0.129 | 0.079 |
|                | <i>P. uncinata</i>   | 27 | 362 | 2  | 0  | 0.00192 | 0.71889         | 0 | 0.74279 | 0.604 | 0.066 |
|                | <i>P. sylvestris</i> | 28 | 362 | 2  | 1  | 0.0013  | -0.21831        | 0 | 0.54209 | 0.442 | 0.087 |
| <b>PR_2_35</b> | <i>P. uliginosa</i>  | 32 | 420 | 9  | 2  | 0.00594 | -0.00916        | 1 | 2.42459 | 0.756 | 0.070 |
|                | <i>P. mugo</i>       | 30 | 420 | 3  | 1  | 0.00165 | -0.21724        | 0 | 0.97173 | 0.487 | 0.097 |
|                | <i>P. uncinata</i>   | 30 | 420 | 2  | 0  | 0.0009  | -1.18883        | 0 | 0.71824 | 0.356 | 0.106 |
|                | <i>P. sylvestris</i> | 29 | 420 | 5  | 2  | 0.00261 | -0.39886        | 0 | 1.30291 | 0.606 | 0.081 |
| <b>PR_2_38</b> | <i>P. uliginosa</i>  | 32 | 441 | 10 | 4  | 0.00552 | 0.00859         | 2 | 1.73005 | 0.724 | 0.074 |
|                | <i>P. mugo</i>       | 29 | 441 | 6  | 2  | 0.00402 | 0.52754         | 0 | 1.5551  | 0.643 | 0.054 |
|                | <i>P. uncinata</i>   | 29 | 441 | 5  | 0  | 0.00488 | 2.00776         | 0 | 1.45306 | 0.576 | 0.048 |
|                | <i>P. sylvestris</i> | 28 | 441 | 8  | 1  | 0.00388 | -0.46127        | 0 | 1.0915  | 0.601 | 0.061 |
| <b>PR_2_41</b> | <i>P. uliginosa</i>  | 31 | 372 | 8  | 3  | 0.00413 | -0.70313        | 0 | 1.28649 | 0.727 | 0.070 |
|                | <i>P. mugo</i>       | 30 | 372 | 7  | 4  | 0.00275 | -1.24401        | 0 | 0.85249 | 0.586 | 0.098 |
|                | <i>P. uncinata</i>   | 30 | 372 | 8  | 3  | 0.0058  | 0.20604         | 0 | 1.79694 | 0.752 | 0.058 |
|                | <i>P. sylvestris</i> | 29 | 372 | 4  | 0  | 0.00364 | 0.74237         | 0 | 1.87755 | 0.655 | 0.057 |
| <b>PR_2_45</b> | <i>P. uliginosa</i>  | 23 | 399 | 5  | 1  | 0.00393 | 0.02788         | 0 | 1.2346  | 0.644 | 0.092 |
|                | <i>P. mugo</i>       | 30 | 399 | 7  | 4  | 0.00389 | -0.67509        | 0 | 1.09074 | 0.586 | 0.098 |
|                | <i>P. uncinata</i>   | 30 | 399 | 5  | 1  | 0.00366 | -0.44101        | 0 | 1.01089 | 0.736 | 0.056 |
|                | <i>P. sylvestris</i> | 29 | 399 | 6  | 4  | 0.00328 | -1.06068        | 0 | 0.89961 | 0.8   | 0.038 |
| <b>PR_2_47</b> | <i>P. uliginosa</i>  | 26 | 552 | 4  | 0  | 0.00233 | 0.58288         | 0 | 1.47143 | 0.64  | 0.091 |
|                | <i>P. mugo</i>       | 29 | 552 | 3  | 0  | 0.00268 | 2.20539         | 0 | 1.63595 | 0.675 | 0.034 |
|                | <i>P. uncinata</i>   | 29 | 552 | 6  | 2  | 0.00389 | 1.13995         | 0 | 2.25346 | 0.663 | 0.054 |
|                | <i>P. sylvestris</i> | 28 | 552 | 9  | 3  | 0.0045  | 0.20506         | 0 | 2.96543 | 0.685 | 0.083 |
| <b>PR_2_48</b> | <i>P. uliginosa</i>  | 29 | 713 | 16 | 7  | 0.00409 | -1.04631        | 1 | 2.22772 | 0.756 | 0.079 |
|                | <i>P. mugo</i>       | 29 | 713 | 23 | 11 | 0.00529 | -1.3217         | 0 | 2.85592 | 0.906 | 0.03  |
|                | <i>P. uncinata</i>   | 29 | 713 | 21 | 6  | 0.00682 | -0.40107        | 0 | 3.69475 | 0.899 | 0.033 |
|                | <i>P. sylvestris</i> | 27 | 713 | 23 | 11 | 0.00766 | -0.38989        | 0 | 4.0097  | 0.883 | 0.033 |
| <b>PR_4_5</b>  | <i>P. uliginosa</i>  | 32 | 357 | 6  | 2  | 0.00346 | -0.47883        | 1 | 1.17191 | 0.637 | 0.076 |
|                | <i>P. mugo</i>       | 30 | 357 | 4  | 3  | 0.0016  | -1.11781        | 0 | 0.6565  | 0.515 | 0.089 |
|                | <i>P. uncinata</i>   | 30 | 357 | 6  | 2  | 0.00359 | -0.48865        | 0 | 1.18347 | 0.453 | 0.105 |
|                | <i>P. sylvestris</i> | 29 | 357 | 4  | 1  | 0.00374 | 0.74237         | 0 | 1.22368 | 0.463 | 0.08  |
| <b>PR_4_10</b> | <i>P. uliginosa</i>  | 31 | 358 | 2  | 0  | 0.00253 | 1.61377         | 1 | 0.7935  | 0.695 | 0.036 |
|                | <i>P. mugo</i>       | 30 | 358 | 2  | 1  | 0.00101 | -1.22455        | 0 | 0.38908 | 0.352 | 0.103 |
|                | <i>P. uncinata</i>   | 30 | 358 | 2  | 1  | 0.00164 | 0.32082         | 0 | 0.5546  | 0.549 | 0.038 |
|                | <i>P. sylvestris</i> | 27 | 358 | 1  | 1  | 0.00021 | -1.15354        | 0 | 0.18018 | 0.074 | 0.067 |
| <b>PR_4_11</b> | <i>P. uliginosa</i>  | 29 | 410 | 9  | 2  | 0.00494 | -0.48618        | 0 | 1.61315 | 0.781 | 0.048 |
|                | <i>P. mugo</i>       | 30 | 410 | 9  | 1  | 0.00524 | -0.2963         | 0 | 1.68027 | 0.653 | 0.085 |
|                | <i>P. uncinata</i>   | 30 | 410 | 9  | 2  | 0.00469 | -0.59504        | 0 | 1.51648 | 0.766 | 0.053 |
|                | <i>P. sylvestris</i> | 29 | 410 | 9  | 5  | 0.004   | -0.99106        | 0 | 1.30729 | 0.685 | 0.09  |
| <b>PR_4_12</b> | <i>P. uliginosa</i>  | 32 | 530 | 8  | 2  | 0.00463 | 0.7039          | 0 | 2.42695 | 0.704 | 0.050 |
|                | <i>P. mugo</i>       | 30 | 530 | 9  | 3  | 0.00501 | 0.5276          | 0 | 2.61638 | 0.763 | 0.052 |
|                | <i>P. uncinata</i>   | 30 | 530 | 6  | 0  | 0.00457 | 1.70738         | 0 | 2.3944  | 0.715 | 0.040 |
|                | <i>P. sylvestris</i> | 29 | 530 | 6  | 6  | 0.00091 | <b>-2.1762</b>  | 0 | 0.57834 | 0.261 | 0.106 |
| <b>PR_4_18</b> | <i>P. uliginosa</i>  | 31 | 321 | 4  | 3  | 0.00147 | -1.34255        | 0 | 0.54167 | 0.385 | 0.099 |
|                | <i>P. mugo</i>       | 30 | 321 | 1  | 1  | 0.00021 | -1.147          | 0 | 0.23077 | 0.067 | 0.061 |
|                | <i>P. uncinata</i>   | 30 | 321 | 1  | 1  | 0.00021 | -1.147          | 0 | 0.23077 | 0.067 | 0.061 |
|                | <i>P. sylvestris</i> | 27 | 321 | 2  | 0  | 0.00156 | -0.07121        | 0 | 0.57051 | 0.467 | 0.094 |
| <b>PR_4_21</b> | <i>P. uliginosa</i>  | 31 | 357 | 22 | 6  | 0.01397 | -0.59885        | 6 | 4.1664  | 0.92  | 0.031 |
|                | <i>P. mugo</i>       | 28 | 357 | 6  | 2  | 0.00435 | 0.02085         | 0 | 1.57115 | 0.765 | 0.054 |
|                | <i>P. uncinata</i>   | 30 | 357 | 7  | 1  | 0.00422 | -0.43676        | 0 | 1.53487 | 0.805 | 0.041 |
|                | <i>P. sylvestris</i> | 27 | 357 | 6  | 2  | 0.00377 | -0.39901        | 0 | 1.41973 | 0.744 | 0.054 |
| <b>PR_4_34</b> | <i>P. uliginosa</i>  | 29 | 360 | 3  | 0  | 0.00156 | -0.62937        | 0 | 0.49421 | 0.502 | 0.099 |
|                | <i>P. mugo</i>       | 27 | 360 | 5  | 5  | 0.00103 | <b>-2.00406</b> | 0 | 0.34286 | 0.279 | 0.112 |
|                | <i>P. uncinata</i>   | 30 | 360 | 3  | 3  | 0.00056 | -1.73178        | 0 | 0.21053 | 0.131 | 0.082 |
|                | <i>P. sylvestris</i> | 29 | 360 | 2  | 0  | 0.00074 | -0.98857        | 0 | 0.26255 | 0.256 | 0.102 |

|                        |                      |      |       |     |     |         |          |    |         |         |         |
|------------------------|----------------------|------|-------|-----|-----|---------|----------|----|---------|---------|---------|
| <b>PR_4_38</b>         | <i>P. uliginosa</i>  | 28   | 512   | 5   | 3   | 0.00097 | -1.71968 | 0  | 0.41326 | 0.328   | 0.112   |
|                        | <i>P. mugo</i>       | 30   | 512   | 6   | 4   | 0.00164 | -1.30296 | 0  | 0.66724 | 0.543   | 0.1     |
|                        | <i>P. uncinata</i>   | 30   | 512   | 6   | 5   | 0.00123 | -1.68413 | 0  | 0.51552 | 0.446   | 0.101   |
|                        | <i>P. sylvestris</i> | 27   | 512   | 3   | 0   | 0.0011  | -0.70335 | 0  | 0.45738 | 0.33    | 0.108   |
| <b>PR_4_41</b>         | <i>P. uliginosa</i>  | 28   | 591   | 13  | 2   | 0.00555 | -0.06307 | 1  | 2.75573 | 0.862   | 0.047   |
|                        | <i>P. mugo</i>       | 29   | 591   | 13  | 6   | 0.00493 | -0.40084 | 0  | 2.48263 | 0.776   | 0.06    |
|                        | <i>P. uncinata</i>   | 30   | 591   | 18  | 7   | 0.00742 | -0.11928 | 0  | 3.65828 | 0.876   | 0.041   |
|                        | <i>P. sylvestris</i> | 28   | 591   | 16  | 11  | 0.00394 | -1.4919  | 0  | 2.01911 | 0.907   | 0.034   |
| <b>rps10</b>           | <i>P. uliginosa</i>  | 31   | 355   | 4   | 0   | 0.00376 | 0.84416  | 1  | 1.34464 | 0.742   | 0.046   |
|                        | <i>P. mugo</i>       | 29   | 355   | 3   | 1   | 0.0024  | 0.27469  | 1  | 1.10854 | 0.547   | 0.096   |
|                        | <i>P. uncinata</i>   | 30   | 355   | 4   | 0   | 0.00382 | 0.88151  | 1  | 1.26188 | 0.761   | 0.044   |
|                        | <i>P. sylvestris</i> | 22   | 355   | 2   | 0   | 0.00246 | 1.34546  | 0  | 0.84127 | 0.593   | 0.085   |
| <b>Species average</b> |                      |      |       |     |     |         |          |    |         |         |         |
|                        | <i>P. uliginosa</i>  | 29.3 | 19414 | 441 | 155 | 0.00525 | -0.28    | 39 | 1.86431 | 0.68933 | 0.06642 |
|                        | <i>P. mugo</i>       | 29.3 | 19414 | 365 | 154 | 0.00404 | -0.37    | 8  | 1.50080 | 0.60092 | 0.07071 |
|                        | <i>P. uncinata</i>   | 29.6 | 19414 | 363 | 113 | 0.00455 | -0.14    | 8  | 1.65601 | 0.62260 | 0.06590 |
|                        | <i>P. sylvestris</i> | 27.8 | 19414 | 367 | 128 | 0.00458 | -0.16    | 14 | 1.68221 | 0.59831 | 0.07269 |

N - average number of sequences analyzed per locus; L - total length of sequence in base pairs excluding indels; P - total number of polymorphic sites; S - total number of singleton mutations);  $\pi$  - average nucleotide diversity; D - Tajima's D statistic; R - average number of recombination events Ks - average pairwise divergence per site to the outgroup *P. pinaster* at all loci; Hd - haplotype diversity; SD - standard deviation of haplotype diversity. Tajimas's D values significant at  $p < 0.05$  are bolded.



**Table S4. Maximum likelihoods and Akaike statistics for all 16 evolutionary models tested in fastsimcoal2.**  
(see Figure 5 for details of scenario)

| Model | $\Delta$ likelihood | AIC  | $\Delta$ AIC |
|-------|---------------------|------|--------------|
| S12   | 349.645             | 4239 | 0            |
| S14   | 353.749             | 4252 | 13           |
| S15   | 355.781             | 4267 | 28           |
| S11   | 355.375             | 4269 | 30           |
| S13   | 356.333             | 4270 | 31           |
| S16   | 366.586             | 4319 | 80           |
| S6    | 384.285             | 4376 | 138          |
| S1    | 385.150             | 4378 | 140          |
| S10   | 384.380             | 4385 | 146          |
| S7    | 384.519             | 4391 | 153          |
| S4    | 390.027             | 4395 | 156          |
| S3    | 390.547             | 4403 | 164          |
| S8    | 387.833             | 4405 | 166          |
| S2    | 393.085             | 4415 | 176          |
| S9    | 390.620             | 4418 | 179          |
| S5    | 395.510             | 4428 | 189          |

Best model is indicated in grey (lowest value of AIC). See Figure for details of each scenario.

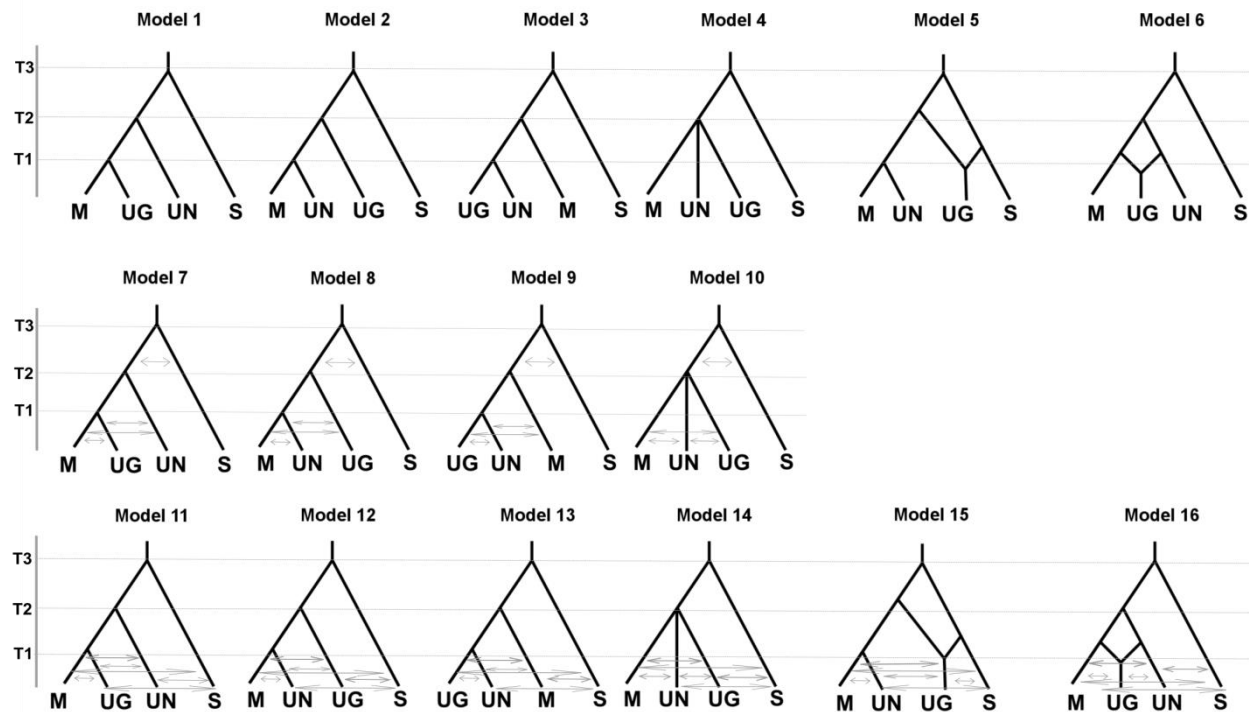

**Figure S1 Schematic representation of the 16 demographic models tested in fastsimcoal2.** Four models represent possible dichotomous and polytomous divergence between taxa from *P. mugo* complex after their split from *P. sylvestris* (models 1-4), two represent possible hybrid origin of *P. uliginosa* with different putative parental taxa (model 5-6), and the rest is variation of models 1-6 with different asymmetric migration matrix between species. Population divergence/hybridization times are indicated by T1-T3 parameters, and migration is indicated by arrows.

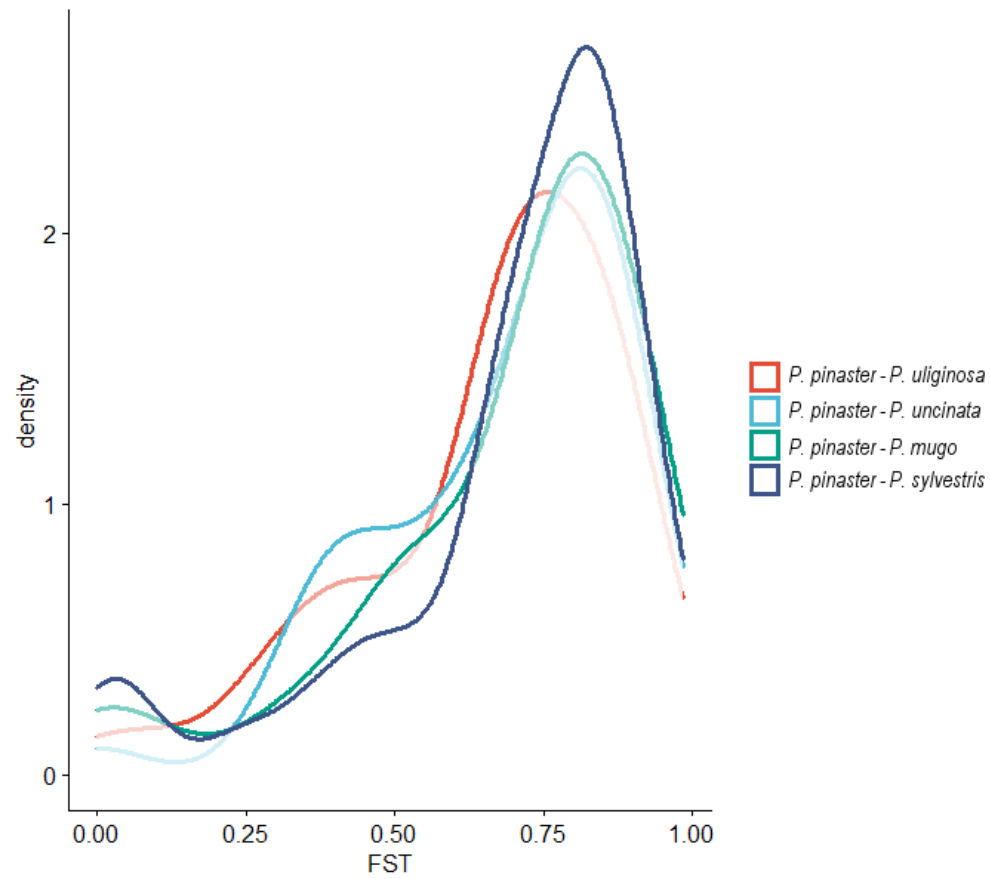

**Figure S2. Distribution of genetic differentiation ( $F_{ST}$ ) in pairwise comparisons between four studied pines and an outgroup *P. pinaster* based on all variable sites in a set of 48 nuclear loci.**

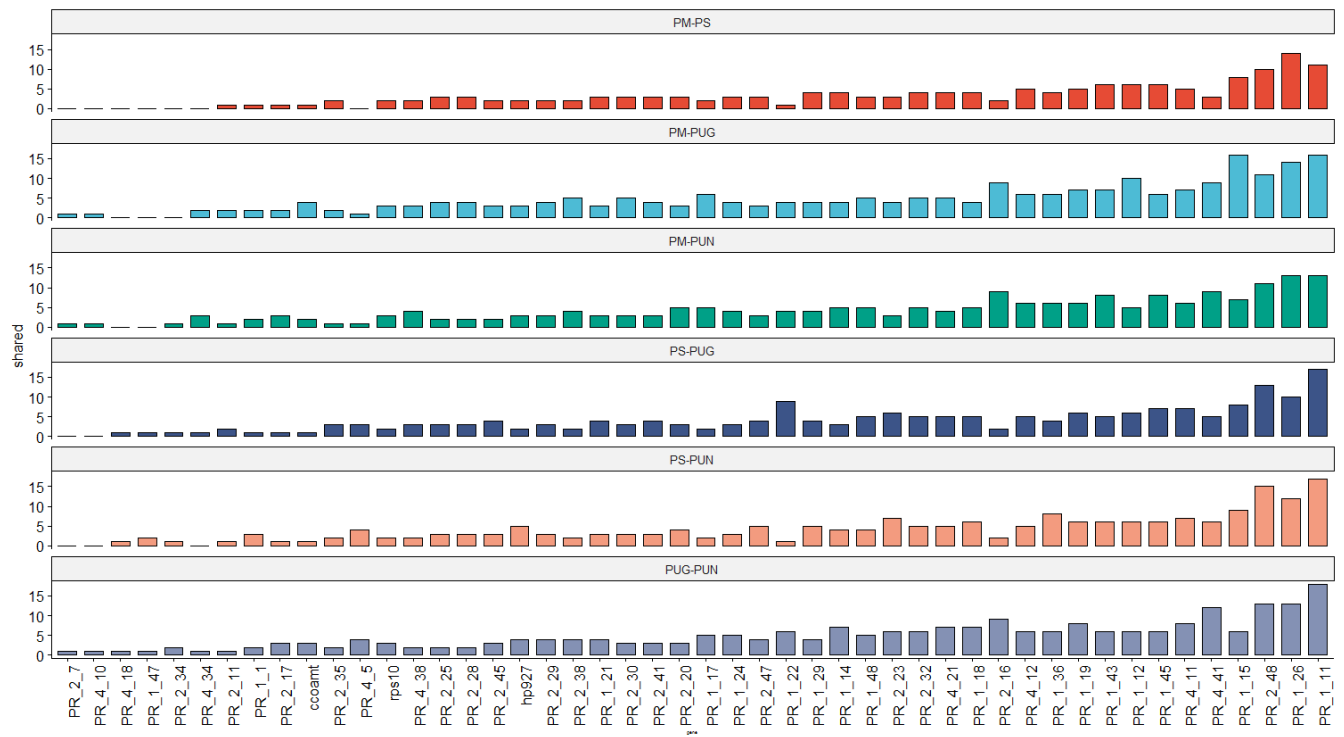

**Figure S3.** Numbers of shared polymorphism between studied species in pairwise comparisons across all of the 48 nuclear loci studied.

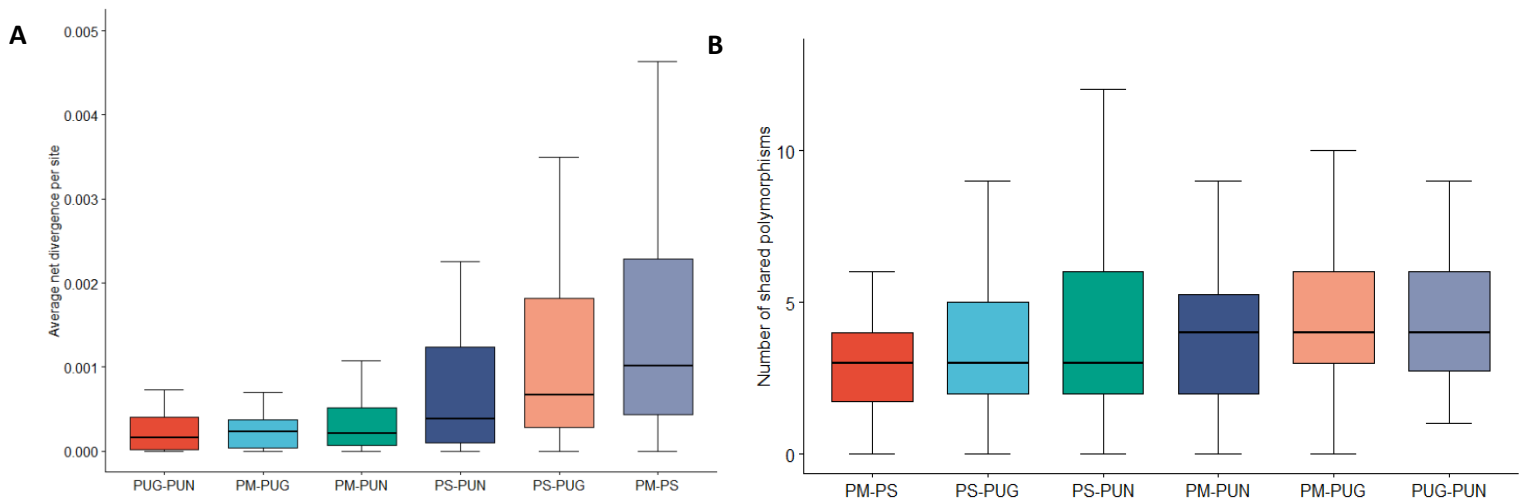

**Figure S4.** Net between-species divergence per site (A), and number of shared polymorphisms (B) in pairwise comparisons averaged across 48 nuclear loci.

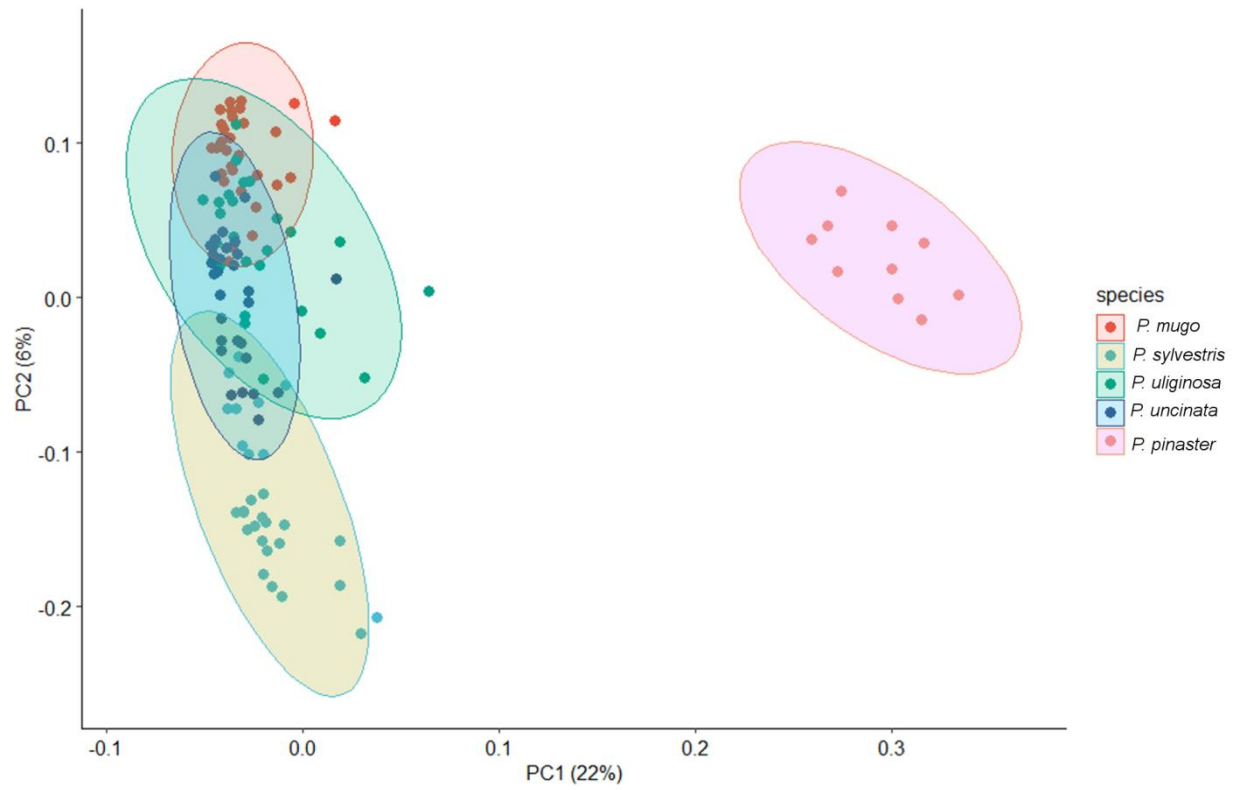

**Figure S5.** The results of the principal components analysis (PCA) showing differentiation of species (*P. pinaster* included as an outgroup) by the first two principal axes.

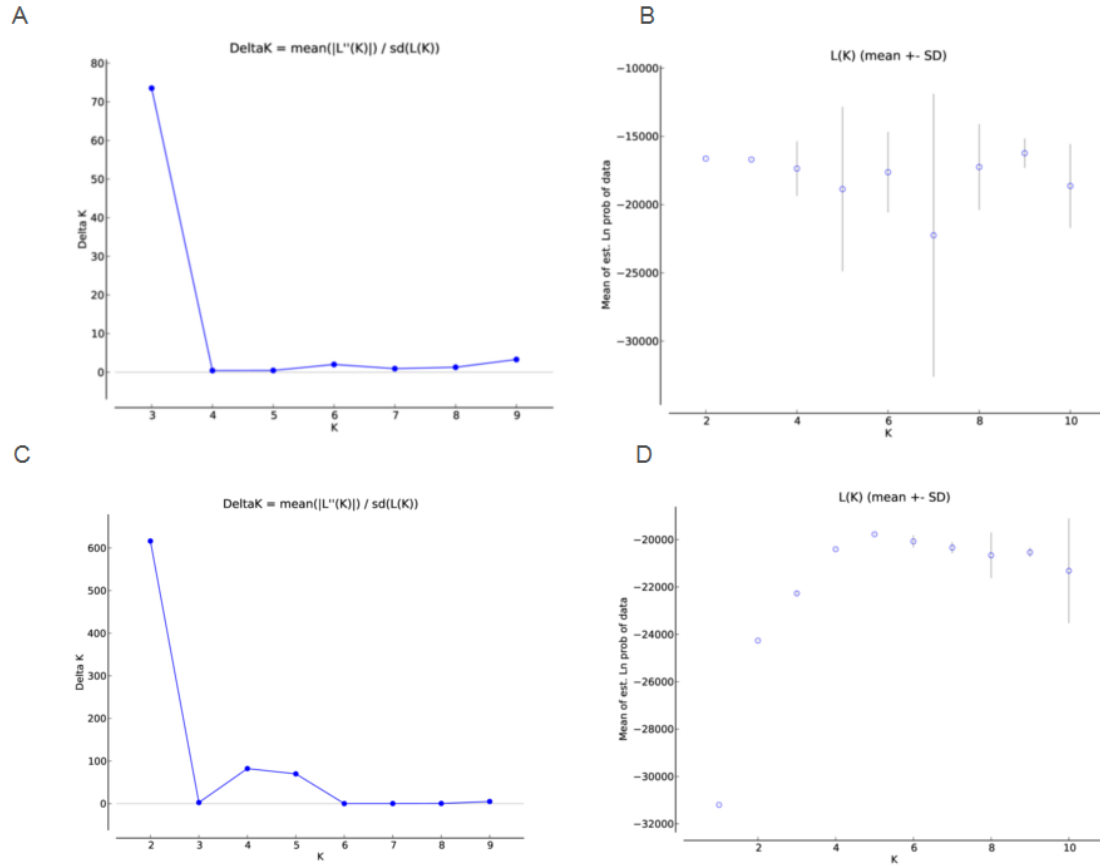

**Figure S6. The results of likelihood estimate and Evanno method for STRUCTURE runs.** results of likelihood estimate  $\Delta K$  and the log probability Evanno method for STRUCTURE runs with *P. pinaster* (A, B); and without *P. pinaster* as an outgroup (C, D). For STRUCTURE results, see Figure 3.

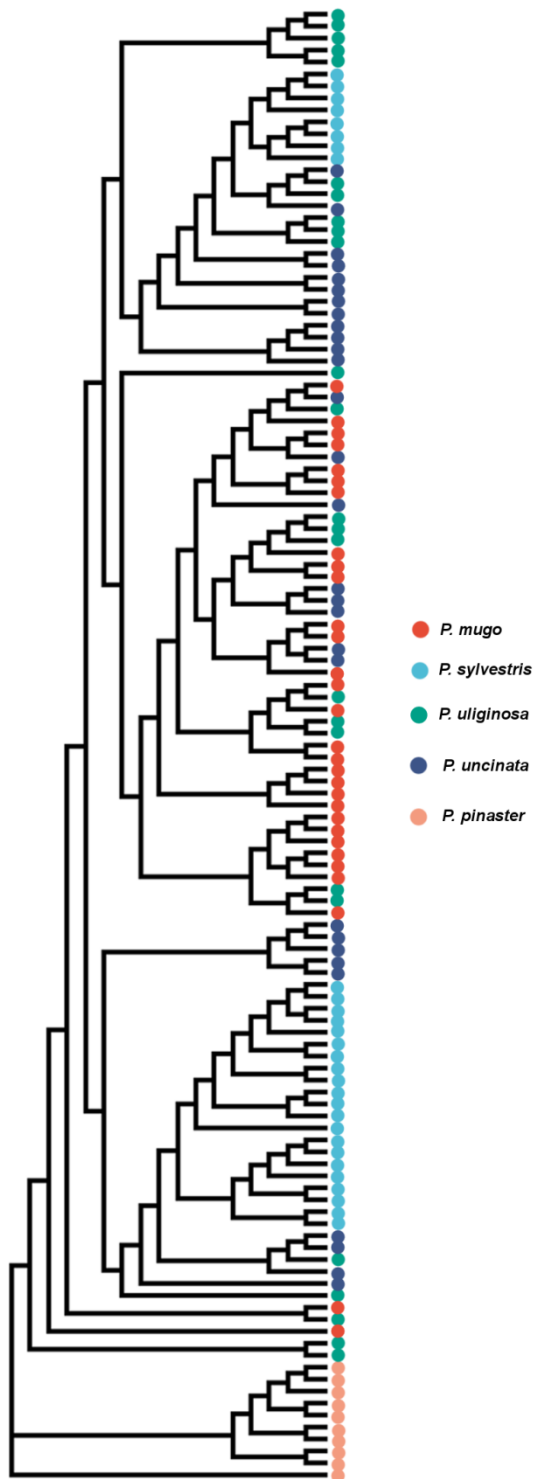

**Figure S7** Phylogenetic relationships (ML tree) of 132 samples of *P. uliginosa*, *P. mugo*, *P. uncinata* and *P. sylvestris* rooted with *P. pinaster* based on the concatenated sequence of 48 nuclear loci. Due to the overall excess of low bootstrap values (< 50) bootstrap values were not shown to improve figure readability. Species color coded as in Figure 3 and Figure 5.
